# Supplementary material for: Visualisation and analysis of hepatitis C virus non-structural proteins using super-resolution microscopy
Source: PubMed Central journal article supplement (PMC6134135; doi:10.1038/s41598-018-31861-0), 2018-09-11
Supplement: 41598_2018_31861_MOESM1_ESM.pdf [file 41598_2018_31861_MOESM1_ESM.pdf]

| Sample                                 | Antibody            | $Ab_{\text{fluor}}$ | $N_{\text{locs}}$ | $S_{\text{fid}}$ (nm) |      |       | $N_{\text{cl}}$ | $n_{\text{locs/cl}}$ | $D_{\text{cl}}$ (nm) |
|----------------------------------------|---------------------|---------------------|-------------------|-----------------------|------|-------|-----------------|----------------------|----------------------|
|                                        |                     |                     |                   | x                     | y    | z     |                 |                      |                      |
| Huh7 24 hpi JFH-1                      | $\alpha\text{NS5A}$ | 1.1                 | 151,961           | 17.8                  | 15.7 | 52.5  | 350             | $142.0 \pm 8.6$      | $105.1 \pm 3.7$      |
|                                        |                     |                     | 217,017           | 10.3                  | 10.8 | 36.0  | 398             | $146.4 \pm 7.6$      | $81.4 \pm 2.3$       |
|                                        |                     |                     | 143,262           | 11.1                  | 11.8 | 42.0  | 143             | $162.1 \pm 18.0$     | $88.4 \pm 2.9$       |
|                                        | $\alpha\text{NS3}$  | 0.8                 | 144,839           | 22.2                  | 23.0 | 122.9 | 356             | $98.5 \pm 4.6$       | $56.0 \pm 1.3$       |
|                                        |                     |                     | 90,358            | 10.8                  | 9.8  | 54.2  | 218             | $70.4 \pm 3.5$       | $52.9 \pm 1.6$       |
|                                        |                     |                     | 277,315           | 34.5                  | 21.5 | 111.6 | 369             | $97.0 \pm 4.5$       | $79.9 \pm 2.1$       |
| Huh7 24 hpi JFH-1<br>+ 8 h DMSO        | $\alpha\text{NS5A}$ | 1.2                 | 245,248           | 13.3                  | 15.1 | 52.8  | 601             | $171.0 \pm 9.7$      | $100.0 \pm 2.3$      |
|                                        |                     |                     | 239,968           | 23.9                  | 15.7 | 61.8  | 474             | $190.3 \pm 10.5$     | $81.9 \pm 2.6$       |
|                                        |                     |                     | 147,165           | 26.4                  | 14.2 | 99.3  | 463             | $103.4 \pm 4.1$      | $60.2 \pm 1.4$       |
| HuH7 24 hpi JFH-1<br>+ 8 h DCV         | $\alpha\text{NS5A}$ | 1.4                 | 244,218           | 7.3                   | 16.9 | 34.9  | 562             | $184.7 \pm 13.8$     | $70.0 \pm 2.1$       |
|                                        |                     |                     | 277,811           | 9.0                   | 8.6  | 25.7  | 510             | $195.9 \pm 10.7$     | $77.5 \pm 2.4$       |
|                                        |                     |                     | 93,305            | 14.3                  | 13.5 | 55.9  | 194             | $190.3 \pm 65.7$     | $63.1 \pm 2.5$       |
| Huh7 24 hpi JFH-1 [Y93H]<br>+ 8 h DMSO | $\alpha\text{NS5A}$ | 1.4                 | 246,876           | 12.7                  | 9.4  | 53.9  | 529             | $160.3 \pm 13.2$     | $89.0 \pm 2.1$       |
|                                        |                     |                     | 311,709           | 24.7                  | 20.8 | 112.3 | 697             | $198.2 \pm 12.9$     | $110.5 \pm 3.3$      |
|                                        |                     |                     | 215,817           | 8.8                   | 11.8 | 37.3  | 678             | $132.6 \pm 7.1$      | $71.1 \pm 1.8$       |
| Huh7 24 hpi JFH-1 [Y93H]<br>+ 8 h DCV  | $\alpha\text{NS5A}$ | 1.2                 | 161,712           | 17.6                  | 11.7 | 80.5  | 331             | $125.5 \pm 6.2$      | $67.5 \pm 2.3$       |
|                                        |                     |                     | 194,281           | 12.9                  | 13.6 | 72.1  | 450             | $135.1 \pm 7.4$      | $70.9 \pm 2.1$       |
|                                        |                     |                     | 355,632           | 18.7                  | 17.0 | 91.4  | 936             | $154.9 \pm 9.8$      | $84.1 \pm 1.8$       |
| SGR-Neo-JFH-1 (Stable)                 | $\alpha\text{NS5A}$ | 1.0                 | 157,597           | 13.9                  | 18.9 | 45.4  | 285             | $153.7 \pm 15.9$     | $81.4 \pm 2.6$       |
|                                        |                     |                     | 558,773           | 32.3                  | 22.8 | 158.4 | 1,066           | $252.7 \pm 14.7$     | $113.3 \pm 2.5$      |
|                                        |                     |                     | 431,225           | 17.9                  | 15.9 | 79.1  | 373             | $422.4 \pm 52.6$     | $115.5 \pm 3.7$      |
| Huh7 24 hpi JFH-1<br>+ 8 h DMSO        | $\alpha\text{NS3}$  | 0.8                 | 148,392           | 31.3                  | 25.7 | 193.2 | 150             | $85.4 \pm 7.2$       | $69.5 \pm 2.5$       |
|                                        |                     |                     | 93,033            | 43.8                  | 19.0 | 161.3 | 182             | $85.3 \pm 4.6$       | $85.1 \pm 3.3$       |
|                                        |                     |                     | 171,157           | 29.1                  | 19.3 | 94.8  | 522             | $100.1 \pm 5.2$      | $84.5 \pm 2.2$       |
| Huh7 24 hi JFH-1<br>+ 8 h DCV          | $\alpha\text{NS3}$  | 0.8                 | 164,060           | 39.2                  | 14.4 | 64.0  | 554             | $94.1 \pm 3.8$       | $78.8 \pm 2.1$       |
|                                        |                     |                     | 92,705            | 39.5                  | 18.1 | 70.5  | 188             | $85.2 \pm 7.6$       | $96.1 \pm 3.8$       |
|                                        |                     |                     | 101,812           | 30.1                  | 19.0 | 134.6 | 237             | $93.2 \pm 6.0$       | $74.2 \pm 2.6$       |

10 **Supplementary Table S1: Summary of 3D-dSTORM image characteristics.**  $Ab_{\text{fluor}}$ : Ratio of fluorophore to monoclonal antibody.  $N_{\text{locs}}$ : Total  
11 number of localisations from dataset of 11,000 frames.  $s_{\text{fid}}$ : Localisation precision (standard deviation of localisations) of fiducial markers used  
12 for drift-correction.  $N_{\text{cl}}$ : Number of clusters identified by DBSCAN analysis from regions of interest (ROI).  $n_{\text{locs/cl}}$ : Number of localisations per  
13 cluster (mean  $\pm$  SEM) in ROI.  $D_{\text{cl}}$ : Cluster diameter (mean  $\pm$  SEM) in ROI.

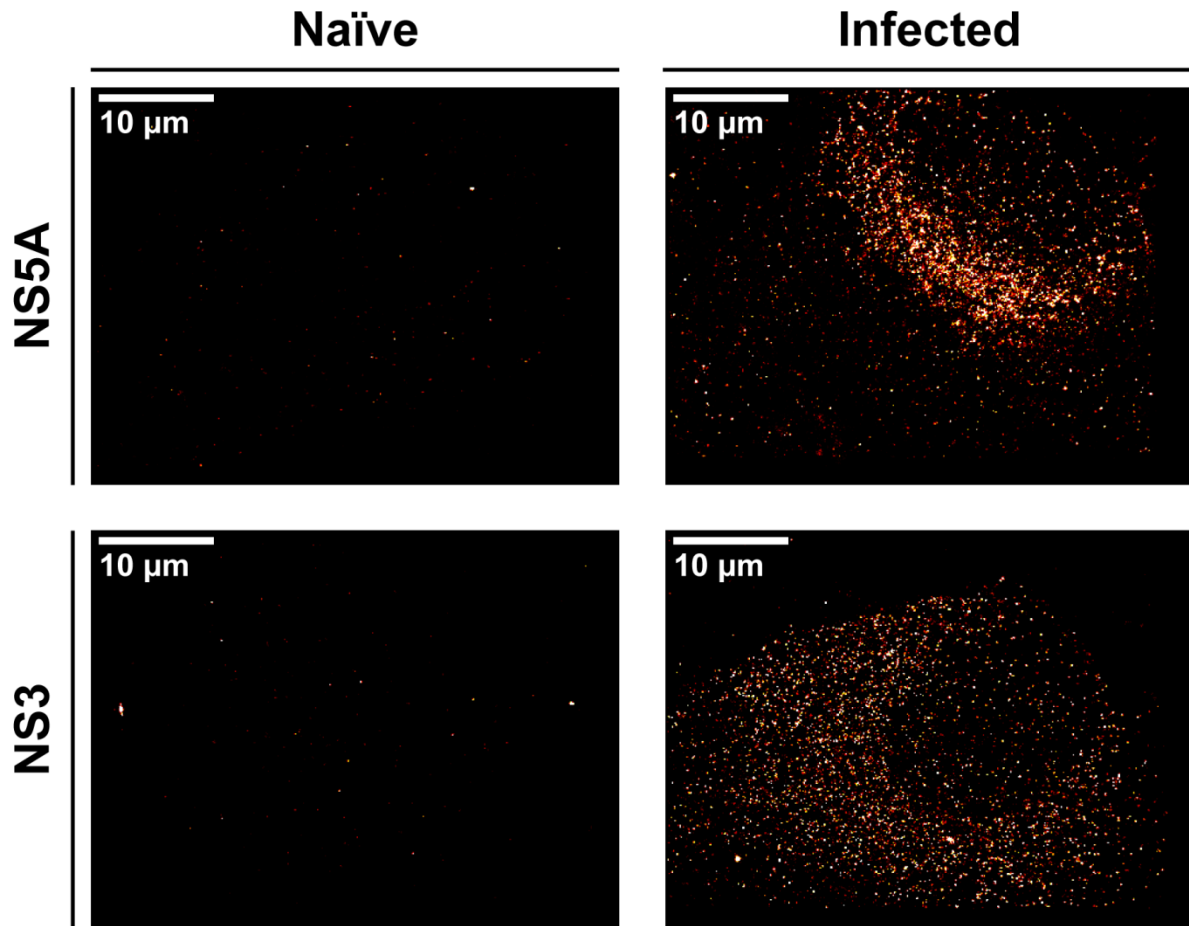

14

15 **Supplementary Figure S1: Validation of antibody staining for 3D-dSTORM.** 3D-dSTORM  
 16 images of naïve or JFH-1 infected Huh7 cells immunostained for NS5A or NS3. Projection of  
 17 2 µm-thick volume, 100 nm histogram bins. 3D-dSTORM images are sum projections over  
 18 depth (z) smoothed with a Gaussian filter  $\sigma = 20$  nm. Histograms for naïve and infected  
 19 cells are shown with the same look-up table for NS5A and NS3, respectively.

20

21

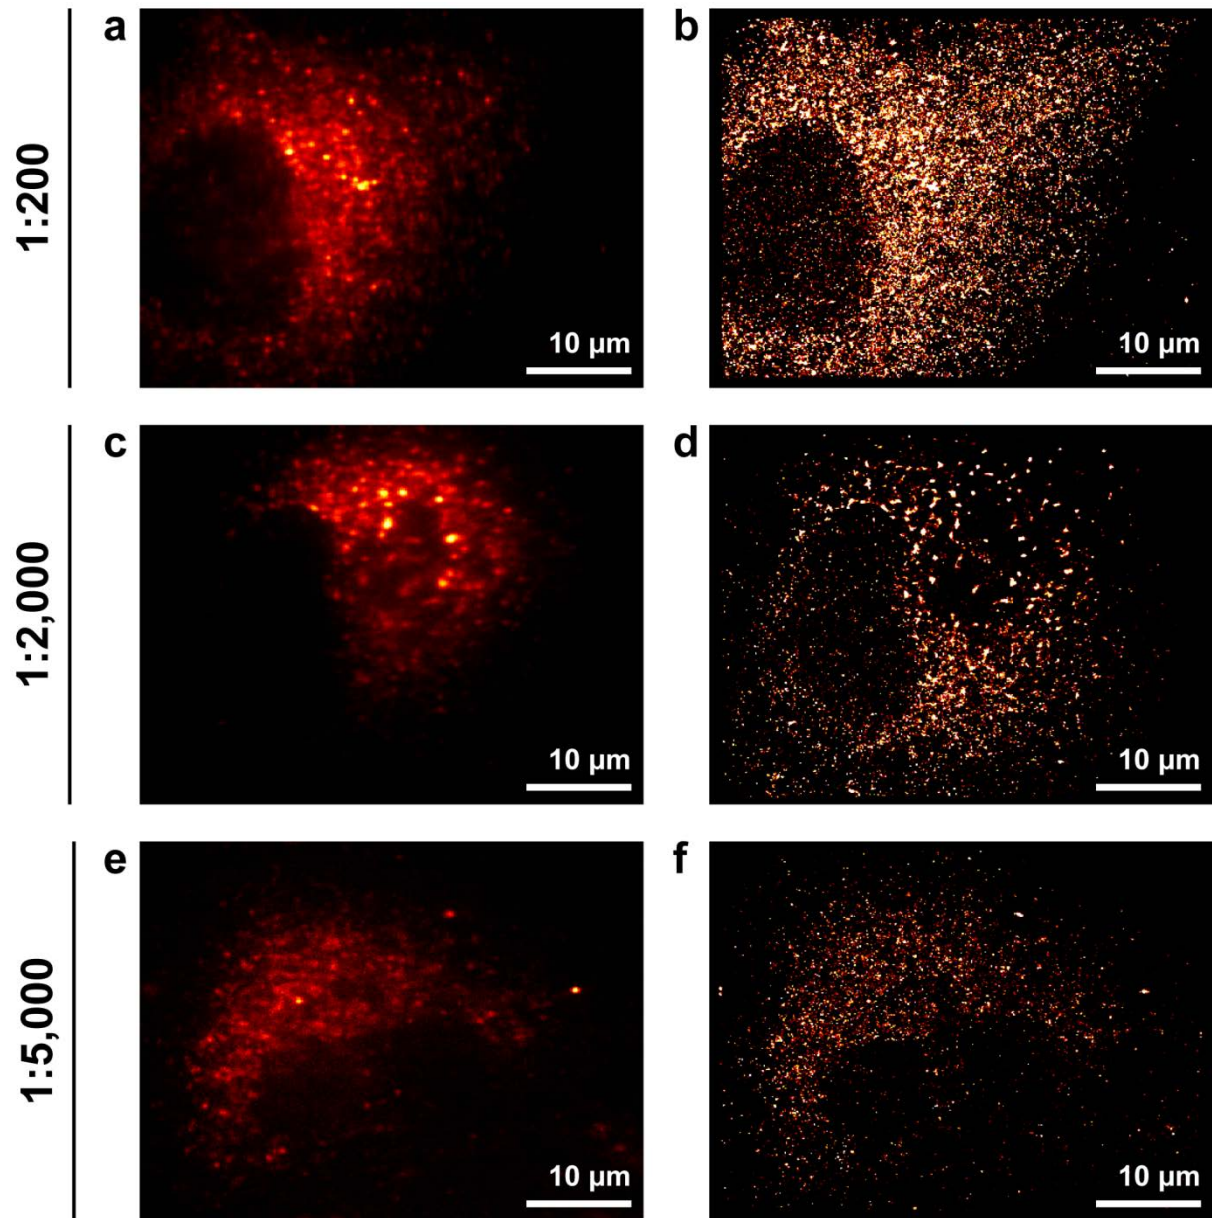

22

23 **Supplementary Figure S2: 3D-dSTORM imaging of Huh7 cells infected with JFH-1 for**  
 24 **24 hours and immunostained for NS5A at different concentrations. (a, b) 1:200, (c, d)**  
 25 **1:2,000, (e, f) 1:5,000. (a, c, e) Wide-field fluorescence image of Huh7 cell stably harbouring**  
 26 **SGR-Neo-JFH-1 and immunostained for NS5A at different concentrations. (b, d, f) 3D-**  
 27 **dSTORM image of cell in a, c, e. Projection of 2 μm-thick volume, 100 nm histogram bins. 3D-**  
 28 **dSTORM images are sum projections over depth (z) smoothed with a Gaussian filter**  
 29  **$\sigma = 20$  nm.**

30

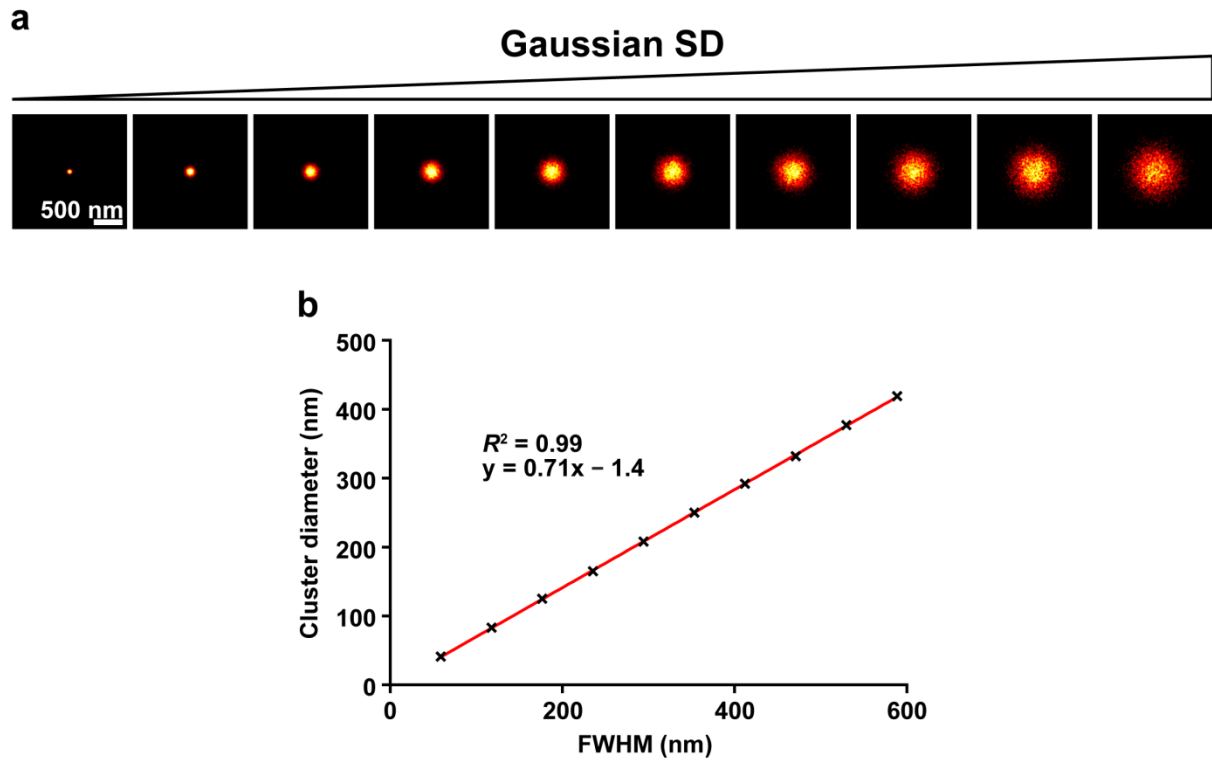

31

32 **Supplementary Figure S3: Correlation between cluster diameter and FWHM. (a)**

33 Simulated clusters of localisations with spherical Gaussian density distributions. Gaussian  
 34 standard deviation ranging from 25–250 nm, in 25 nm intervals. Images are sum projections  
 35 onto the plane shown, with 4 nm histogram bins, smoothed with a Gaussian filter  
 36  $\sigma = 20$  nm. **(b)** Correlation between measured cluster diameter and FWHM of simulated  
 37 clusters. Goodness of fit ( $R^2$ ) and the slope of linear regression are shown.

38

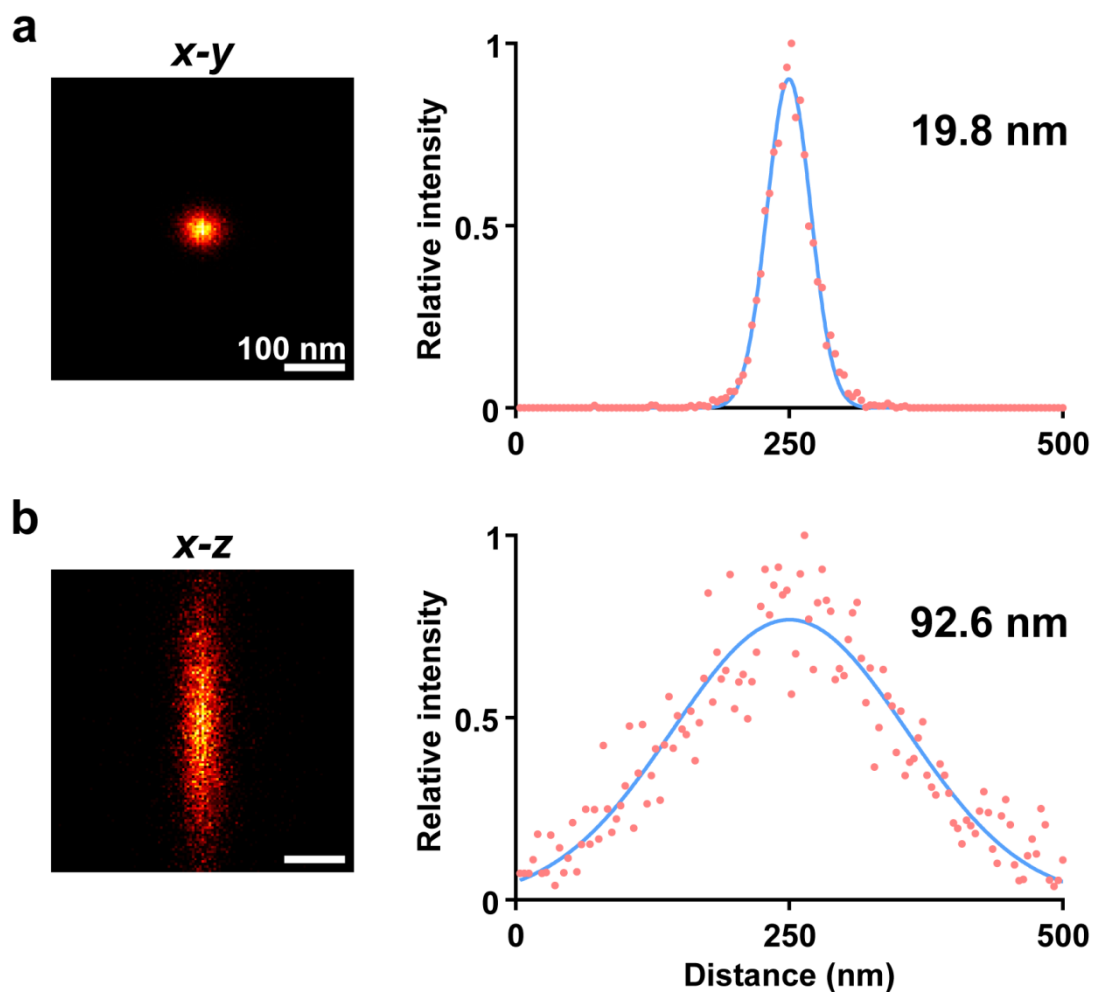

39

40 **Supplementary Figure S4: Localisation precision measurement from smallest NS3**  
 41 **clusters.** (a) x-y (b) x-z. Results of summing the smallest NS3 clusters, containing a total of  
 42 9,901 localisations (124 clusters, up to cluster diameter 45 nm, registered by their centroid).  
 43 Images are sum projections onto the plane shown, with 4 nm histogram bins. Line profiles  
 44 through their centre, normalised to the peak intensity and fitted with a Gaussian model,  
 45 standard deviation of fit is indicated. Precision was expected to be lower in z, and may  
 46 include contributions from intra-cellular inhomogeneity (variations in refractive index,  
 47 including at the boundaries of DMVs).

48

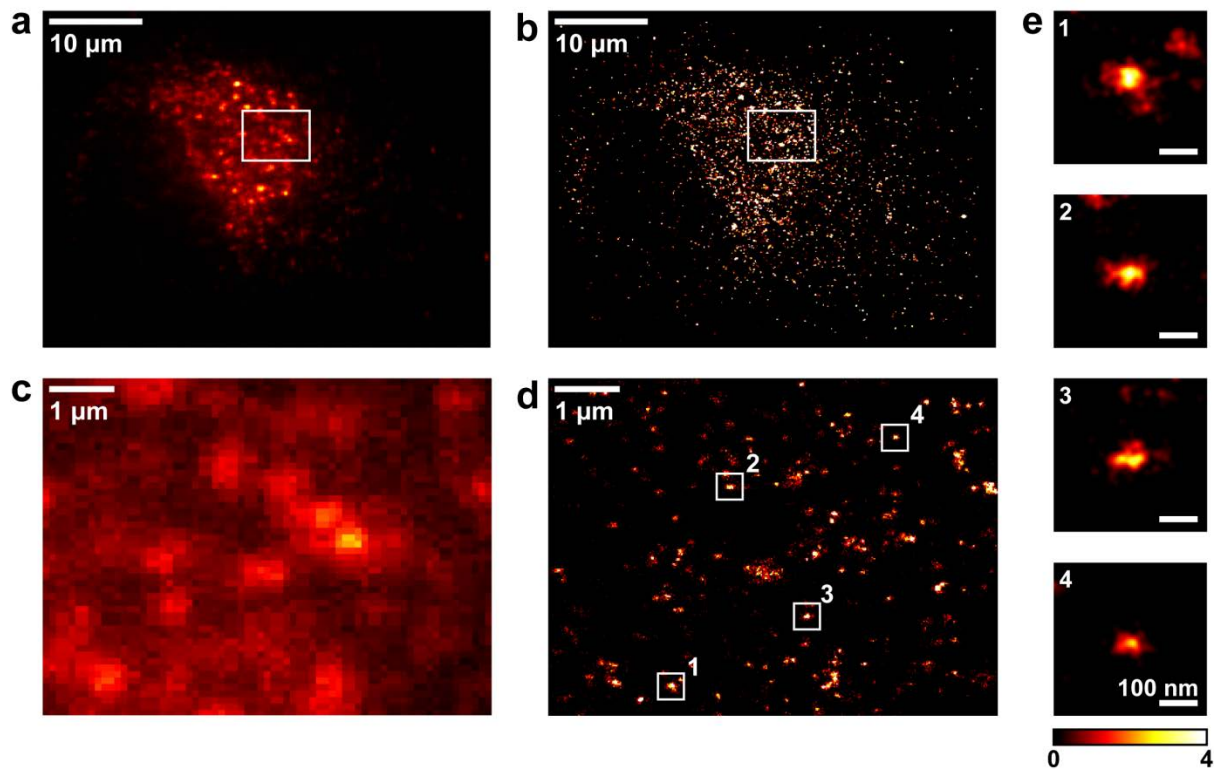

49

50 **Supplementary Figure S5: 3D-dSTORM imaging of Huh7 cells stably harbouring SGR-**  
 51 **Neo-JFH-1 and immunostained for NS5A using Virostat antibody.** (a) Wide-field  
 52 fluorescence image of Huh7 cell stably harbouring SGR-Neo-JFH-1 and immunostained for  
 53 NS5A using Virostat antibody. (b) 3D-dSTORM image of cell in a. Projection of 2 μm-thick  
 54 volume, 100 nm histogram bins. (c) Region of interest within a at higher magnification. (d)  
 55 3D-dSTORM image of region shown in c. Projection of 2 μm-thick volume, 20 nm histogram  
 56 bins. (e) Individual clusters of localisations (numbered in d). Projections of 1 μm-thick  
 57 volumes, 5 nm histogram bins. Colour bar indicates number of localisations per histogram  
 58 bin. 3D-dSTORM images are sum projections over depth (z) smoothed with a Gaussian  
 59 filter  $\sigma = 20$  nm.

60

61



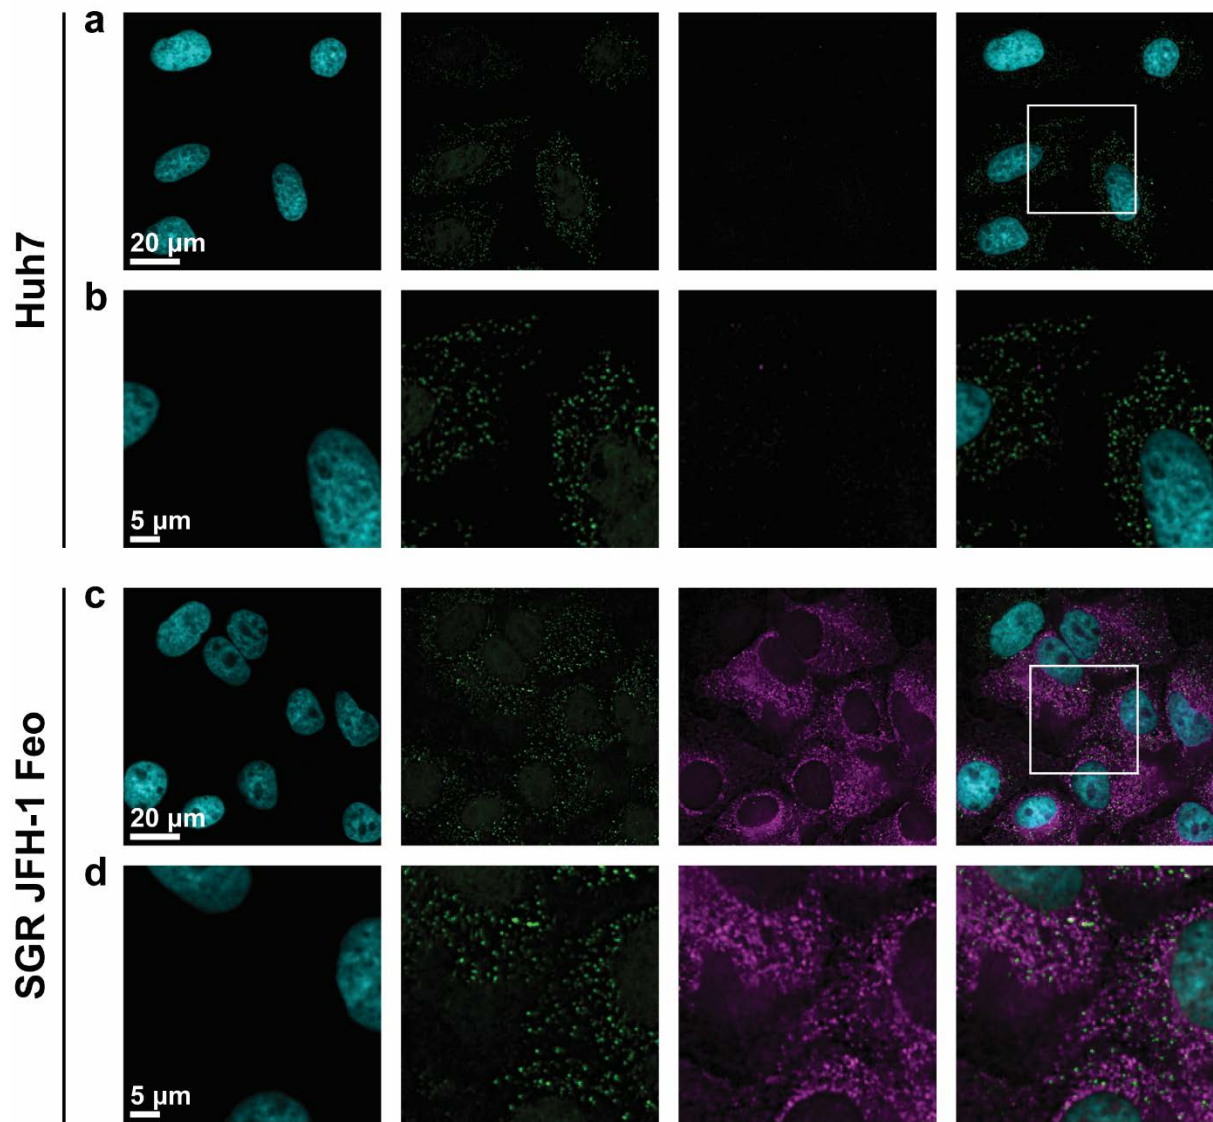

62

63 **Supplementary Figure S6: Immunofluorescence imaging of naïve or SGR-Neo-JFH-1**  
 64 **harbouring Huh7 cell lines immunostained for NS5A and dsRNA. (a) Naïve Huh7 cells.**  
 65 **(b) Magnified view of region of interest from white box in a. (c) SGR-Feo-JFH-1 harbouring**  
 66 **Huh7 cells. (d) Magnified view of region of interest from white box in c. Stained with DAPI**  
 67 **(cyan), and for dsRNA (green) and NS5A (magenta).**
